# Supplementary material
Source: PubMed Central journal article supplement (PMC10360003)

## Supplemental Online Content

Alhefzi M, Redwood J, Hatchell AC, et al. Identifying factors of operative efficiency in head and neck free flap reconstruction. *JAMA Otolaryngol Head Neck Surg*. Published online July 20, 2023. doi:10.1001/jamaoto.2023.1638

**eTable 1.** Tumor characteristics

**eTable 2.** Patients characteristics before and after implementation of standardized nursing team

**eTable 3.** Patients characteristics before and after implementation of treatment centralization

**eTable 4.** The effect of plating techniques on operative time (OR)

**eTable 5.** Secondary outcomes; length of stay (LOS), return to ED within 30 days, readmission rate

**eTable 6.** Effect of treatment centralization and standardized nursing team on length of stay LOS, return to ED within 30 days and readmission rate

**eTable 7.** 2 years and 5 years disease specific survival 2007-2020

**eFigure.** Secondary outcomes (30 days readmission rate, 30 days return to ER) and mean length of stay

This supplemental material has been provided by the authors to give readers additional information about their work.

**eTable 1: Tumor Characteristics:**

---

|                        | <b>Overall (n=590)</b> |
|------------------------|------------------------|
| <b>Tumor Stage* †</b>  |                        |
| High (stage 3-4)       | 390 (66.1%)            |
| Low (stage 1-2)        | 149 (25.2%)            |
| <b>Tumor location*</b> |                        |
| Oral cavity            | 419 (71%)              |
| Skin                   | 48 (8.1%)              |
| Paranasal sinus        | 35 (5.9%)              |
| Salivary gland         | 27 (4.5%)              |
| Oropharynx             | 21 (3.5%)              |
| Larynx                 | 14 (2.3%)              |
| Hypopharynx            | 12 (2%)                |
| Thyroid                | 5 (0.8%)               |
| Others                 | 6 (1.1%)               |

---

\* Indicates some missing data: Tumor stage and severity 51 (8.6%), Tumor location 3 (0.5%)

† Staging at the time of surgery according to the American Joint Committee on Cancer (AJCC). Low (stage 1-2), High (stage 3-4)

**eTable 2: Patients characteristics before and after implementation of standardized nursing team**

|                        | <b>Before<br/>Standardized<br/>nursing team<br/>2007-2009</b> | <b>After<br/>Standardized<br/>nursing team<br/>2009-2020</b> | <b><i>p</i>-value</b> |
|------------------------|---------------------------------------------------------------|--------------------------------------------------------------|-----------------------|
| <b>Gender</b>          |                                                               |                                                              |                       |
| Male                   | 37 (69.8%)                                                    | 372 (69.3%)                                                  | 1                     |
| Female                 | 16 (30.2%)                                                    | 165 (30.7%)                                                  |                       |
| <b>Age</b>             |                                                               |                                                              |                       |
| Mean (SD)              | 62.8 (13.0)                                                   | 60.8 (12.8)                                                  | 0.271                 |
| Median (Min. Max)      | 62.0 (22.0, 84.0)                                             | 62.0 (19.0, 89.0)                                            |                       |
| <b>Smoking*</b>        |                                                               |                                                              |                       |
| Current                | 19 (35.8%)                                                    | 169 (31.5%)                                                  | 0.901                 |
| Ex-smoker              | 19 (35.8%)                                                    | 195 (36.3%)                                                  |                       |
| Never                  | 14 (26%)                                                      | 142 (26.4%)                                                  |                       |
| <b>Alcohol intake*</b> |                                                               |                                                              |                       |
| Heavy                  | 10 (18.9%)                                                    | 120 (22.3%)                                                  | 0.419                 |
| Moderate               | 4 (7.5%)                                                      | 33 (6.1%)                                                    |                       |
| Light                  | 12 (22.6%)                                                    | 152 (28.3%)                                                  |                       |
| Previous               | 12 (22.6%)                                                    | 71 (13.2%)                                                   |                       |
| Never                  | 12 (22.6%)                                                    | 111 (20.7%)                                                  |                       |
| <b>Tumor Stage</b>     |                                                               |                                                              | 0.796                 |
| 0                      | 0 (0%)                                                        | 7 (1.3%)                                                     |                       |
| 1                      | 3 (5.7%)                                                      | 47 (8.8%)                                                    |                       |
| 2                      | 10 (18.9%)                                                    | 82 (15.3%)                                                   |                       |
| 3                      | 8 (15.1%)                                                     | 73 (13.6%)                                                   |                       |
| 4                      | 29 (54.7%)                                                    | 280 (52.1%)                                                  |                       |
| Missing data           | 3 (5.7%)                                                      | 48 (8.9%)                                                    |                       |

---

|                       |            |             |       |
|-----------------------|------------|-------------|-------|
| <b>Tumor Severity</b> |            |             |       |
| High                  | 37 (69.8%) | 353 (65.7%) | 0.915 |
| Low                   | 13 (24.5%) | 136 (25.3%) |       |
| <b>Tumor location</b> |            |             | 0.36  |
| Oral cavity           | 44 (83.0%) | 375 (69.8%) |       |
| Skin                  | 1 (1.9%)   | 47 (8.8%)   |       |
| Paranasal sinus       | 1 (1.9%)   | 34 (6.3%)   |       |
| Salivary gland        | 3 (5.7%)   | 24 (4.5%)   |       |
| Oropharynx            | 3 (5.7%)   | 18 (3.4%)   |       |
| Larynx                | 1 (1.9%)   | 14 (2.6%)   |       |
| Hypopharynx           | 0 (0%)     | 12 (2.2%)   |       |
| Thyroid               | 0 (0%)     | 5 (0.9%)    |       |
| Others                | 0 (0%)     | 6 (1.1%)    |       |
| Missing data          | 0 (0%)     | 2 (0.4%)    |       |

---

\* Indicates some missing data: Smoking: 1 (1.9%) before and 31 (5.8%) after implementation of standardized nursing team, Alcohol intake: 17 (7.7%) before and 36 (9.8%) after implementation of standardized nursing team.

**eTable 3: Patients characteristics before and after implementation of treatment centralization**

|                        | <b>Before<br/>treatment<br/>centralization<br/>2007-2013</b> | <b>After<br/>treatment<br/>centralization<br/>2013-2020</b> | <b><i>p</i>-value</b> |
|------------------------|--------------------------------------------------------------|-------------------------------------------------------------|-----------------------|
| <b>Gender</b>          |                                                              |                                                             |                       |
| Male                   | 152 (68.8%)                                                  | 257 (69.6%)                                                 | 0.897                 |
| Female                 | 69 (31.2%)                                                   | 112 (30.4%)                                                 |                       |
| <b>Age</b>             |                                                              |                                                             |                       |
| Mean (SD)              | 61.7 (13.2)                                                  | 60.5 (12.6)                                                 | 0.277                 |
| Median (Min. Max)      | 63.0 [19.0, 89.0]                                            | 62.0 [21.0, 88.0]                                           |                       |
| <b>Smoking*</b>        |                                                              |                                                             |                       |
| Current                | 81 (36.7%)                                                   | 107 (29.0%)                                                 | 0.236                 |
| Ex-smoker              | 79 (35.7%)                                                   | 135 (36.6%)                                                 |                       |
| Never                  | 54 (24.4%)                                                   | 102 (27.6%)                                                 |                       |
| <b>Alcohol intake*</b> |                                                              |                                                             |                       |
| Heavy                  | 57 (25.8%)                                                   | 73 (19.8%)                                                  | 0.335                 |
| Moderate               | 11 (5.0%)                                                    | 26 (7.0%)                                                   |                       |
| Light                  | 57 (25.8%)                                                   | 107 (29.0%)                                                 |                       |
| Previous               | 35 (15.8%)                                                   | 48 (13.0%)                                                  |                       |
| Never                  | 44 (19.9%)                                                   | 79 (21.4%)                                                  |                       |
| <b>Tumor Stage</b>     |                                                              |                                                             | 0.93                  |
| 0                      | 3 (1.4%)                                                     | 4 (1.1%)                                                    |                       |
| 1                      | 22 (10.0%)                                                   | 28 (7.6%)                                                   |                       |
| 2                      | 34 (15.4%)                                                   | 58 (15.7%)                                                  |                       |
| 3                      | 30 (13.6%)                                                   | 51 (13.8%)                                                  |                       |
| 4                      | 121 (54.8%)                                                  | 188 (50.9%)                                                 |                       |
| Missing data           | 11 (5.0%)                                                    | 40 (10.8%)                                                  |                       |

---

|                       |             |             |       |
|-----------------------|-------------|-------------|-------|
| <b>Tumor Severity</b> |             |             |       |
| High                  | 151 (68.3%) | 239 (64.8%) | 0.915 |
| Low                   | 59 (26.7%)  | 90 (24.4%)  |       |
| <b>Tumor location</b> |             |             | 0.258 |
| Oral cavity           | 168 (76.0%) | 251 (68.0%) |       |
| Skin                  | 15 (6.8%)   | 33 (8.9%)   |       |
| Paranasal sinus       | 9 (4.1%)    | 26 (7.0%)   |       |
| Salivary gland        | 11 (5.0%)   | 16 (4.3%)   |       |
| Oropharynx            | 5 (2.3%)    | 16 (4.3%)   |       |
| Larynx                | 7 (3.2%)    | 8 (2.2%)    |       |
| Hypopharynx           | 4 (1.8%)    | 8 (2.2%)    |       |
| Thyroid               | 2 (0.9%)    | 3 (0.8%)    |       |
| Others                | 0 (0%)      | 6 (1.6%)    |       |
| Missing data          | 0 (0%)      | 2 (0.5%)    |       |

---

\* Indicates some missing data: Smoking: 7 (3.2%) before and 25 (6.8%) after treatment centralization, Alcohol intake: 17 (7.7%) before and 36 (9.8%) after treatment centralization

**eTable 4: The effect of plating techniques on operative time (OR)**

| Plating technique comparison | Estimate<br>(minutes) | Standard Error (SE) | P value |
|------------------------------|-----------------------|---------------------|---------|
| Pre bent to hand bent        | -61.6                 | 24.3                | 0.0271  |
| 3D Plate to pre bent         | -72                   | 27.6                | 0.0332  |
| 3D Plate to hand bent        | -133.7                | 16.5                | <0.0001 |

**eTable 5: Secondary outcomes; length of stay (LOS), return to ED within 30 days, readmission rate.**

| <b>Outcome</b>                         | <b>2007</b>    | <b>2008</b>    | <b>2009</b>    | <b>2010</b>    | <b>2011</b>    | <b>2012</b>    | <b>2013</b>    | <b>2014</b>    | <b>2015</b>    | <b>2016</b>    | <b>2017</b>    | <b>2018</b>    | <b>2019</b>    | <b>2020</b>    | <b>Overall</b> |
|----------------------------------------|----------------|----------------|----------------|----------------|----------------|----------------|----------------|----------------|----------------|----------------|----------------|----------------|----------------|----------------|----------------|
| <b>Number of procedures</b>            | <b>(N=18)</b>  | <b>(N=21)</b>  | <b>(N=43)</b>  | <b>(N=44)</b>  | <b>(N=34)</b>  | <b>(N=47)</b>  | <b>(N=48)</b>  | <b>(N=41)</b>  | <b>(N=38)</b>  | <b>(N=57)</b>  | <b>(N=48)</b>  | <b>(N=70)</b>  | <b>(N=67)</b>  | <b>(N=14)</b>  | <b>(N=590)</b> |
| <b>Readmission rate within 30 days</b> | 0<br>(0%)      | 0<br>(0%)      | 5<br>(11.6%)   | 5<br>(11.4%)   | 1<br>(2.9%)    | 1<br>(2.1%)    | 4<br>(8.3%)    | 3<br>(7.3%)    | 4<br>(10.5%)   | 8<br>(14.0%)   | 6<br>(12.5%)   | 11<br>(15.7%)  | 7<br>(10.4%)   | 0<br>(0%)      | 55<br>(9.3%)   |
| <b>Return to ED within 30 days</b>     | 1<br>(5.6%)    | 3<br>(14.3%)   | 6<br>(14.0%)   | 11<br>(25.0%)  | 4<br>(11.8%)   | 4<br>(8.5%)    | 9<br>(18.8%)   | 7<br>(17.1%)   | 7<br>(18.4%)   | 11<br>(19.3%)  | 10<br>(20.8%)  | 15<br>(21.4%)  | 12<br>(17.9%)  | 2<br>(14.3%)   | 102<br>(17.3%) |
| <b>LOS mean (SD)</b>                   | 14.3<br>(5.09) | 30.1<br>(25.9) | 19.2<br>(14.5) | 21.1<br>(33.7) | 16.5<br>(15.3) | 22.4<br>(53.4) | 15.9<br>(16.0) | 14.2<br>(6.87) | 11.3<br>(4.87) | 18.4<br>(18.8) | 13.0<br>(6.93) | 13.2<br>(14.1) | 12.9<br>(8.81) | 9.57<br>(2.38) | 16.3<br>(21.7) |



**eTable 6: effect of treatment centralization and standardized nursing team on length of stay LOS, return to ED within 30 days and readmission rate:**

|                                    | <b>Before centralization (n=221)</b> | <b>After centralization (n=369)</b> | <b>p-value</b> |
|------------------------------------|--------------------------------------|-------------------------------------|----------------|
| <b>Readmission to hospital</b>     | 16 (7.2%)                            | 42 (11.4%)                          | 0.135          |
| <b>Return to ED within 30 days</b> | 34 (15.4%)                           | 71 (19.2%)                          | 0.283          |
| <b>LOS mean (SD)</b>               | 20.3 (31.3)                          | 13.9 (12.4)                         | <b>0.00374</b> |

  

|                                    | <b>Before standardized nursing team (n=53)</b> | <b>Before standardized nursing team (n=537)</b> |               |
|------------------------------------|------------------------------------------------|-------------------------------------------------|---------------|
| <b>Readmission to hospital</b>     | 1 (1.9%)                                       | 57 (10.9%)                                      | 0.0728        |
| <b>Return to ED within 30 days</b> | 5 (9.4%)                                       | 100 (18.6)                                      | 0.139         |
| <b>LOS mean (SD)</b>               | 23.7 (21.3)                                    | 15.6 (18.6)                                     | <b>0.0104</b> |

**eTable 7: 2 years and 5 years disease specific survival 2007-2020**

|              | <b>2 year<br/>survived</b> | <b>5 years<br/>survived</b> | <b>Total</b> | <b>2yrs</b> | <b>5years</b> |
|--------------|----------------------------|-----------------------------|--------------|-------------|---------------|
| 2009         | 30                         | 23                          | 44           | 68%         | 52%           |
| 2010         | 28                         | 19                          | 46           | 61%         | 41%           |
| 2011         | 27                         | 23                          | 37           | 73%         | 62%           |
| 2012         | 32                         | 28                          | 47           | 68%         | 60%           |
| 2013         | 39                         | 35                          | 49           | 80%         | 71%           |
| 2014         | 29                         | 25                          | 42           | 69%         | 60%           |
| 2015         | 32                         | 28                          | 39           | 82%         | 72%           |
| 2016         | 38                         | 34                          | 58           | 66%         | 59%           |
| 2017         | 35                         | - na -                      | 51           | 69%         | - na -        |
| 2018         | 60                         | - na -                      | 73           | 82%         | - na -        |
| 2019         | 55                         | - na -                      | 68           | 81%         | - na -        |
| 2020         | - na -                     | - na -                      | 14           | - na -      | - na -        |
| <b>Total</b> | <b>405</b>                 | <b>215</b>                  | <b>568*</b>  |             |               |

-na-: not applicable

\* Missing data on 10 patients

**eFigure: Secondary outcomes (30 days readmission rate, 30 days return to ER) and mean length of stay:**

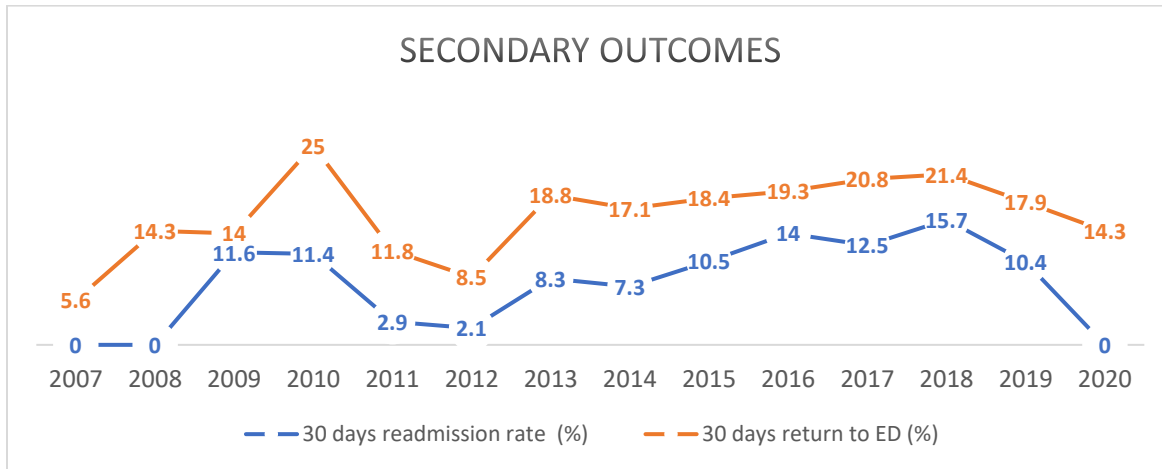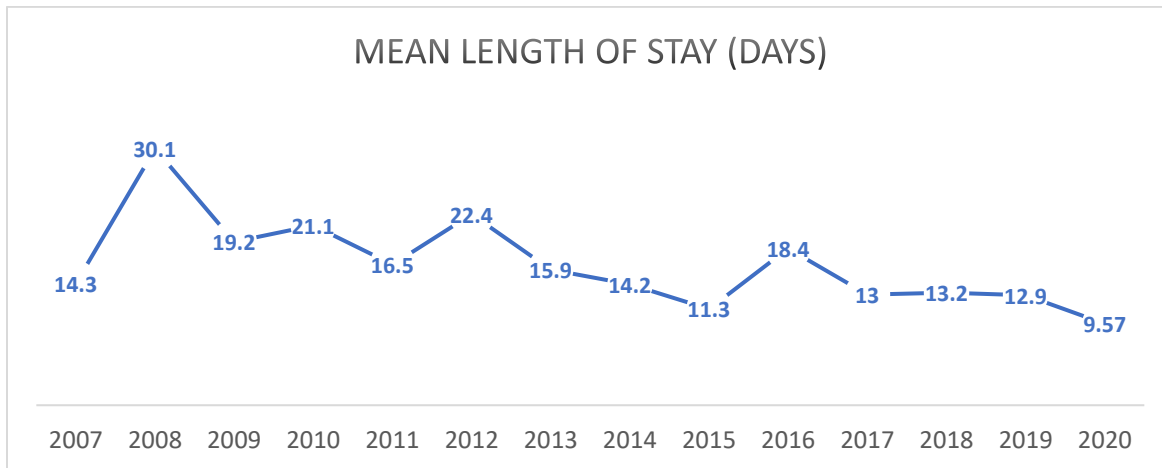

Supplement: jamaotolaryngolheadnecksurg-e231638-s001.pdf [file jamaotolaryngolheadnecksurg-e231638-s001.pdf]
