# Supplementary material
Source: PubMed Central journal article supplement (PMC10360003)
Supplement: jamaotolaryngolheadnecksurg-e231638-s002.pdf [file jamaotolaryngolheadnecksurg-e231638-s002.pdf]

## **Data Sharing Statement**

Alhefzi. Identifying Factors of Operative Efficiency in Head and Neck Free Flap Reconstruction. *JAMA Otolaryngol Head Neck Surg*. Published July 20, 2023. doi:10.1001/jamaoto.2023.1638

### **Data**

**Data available:** No
